# Supplementary material for: In vivo evaluation of histopathologic findings of vascular damage after mechanical thrombectomy with the Tromba device in a canine model of cerebral infarction
Source: PubMed Central journal article supplement (PMC9565453; doi:10.1371/journal.pone.0276108), 2022-10-14

# Raw histopathology images

No.1 H&E (50X)

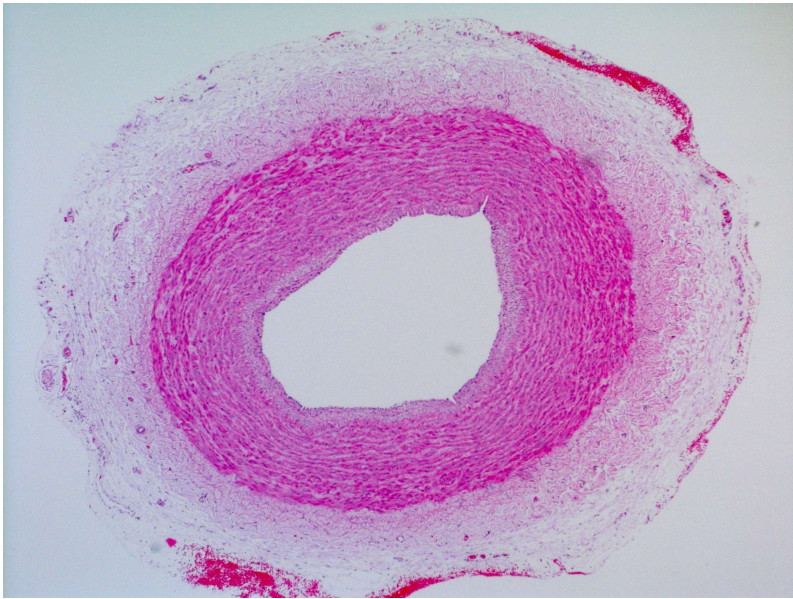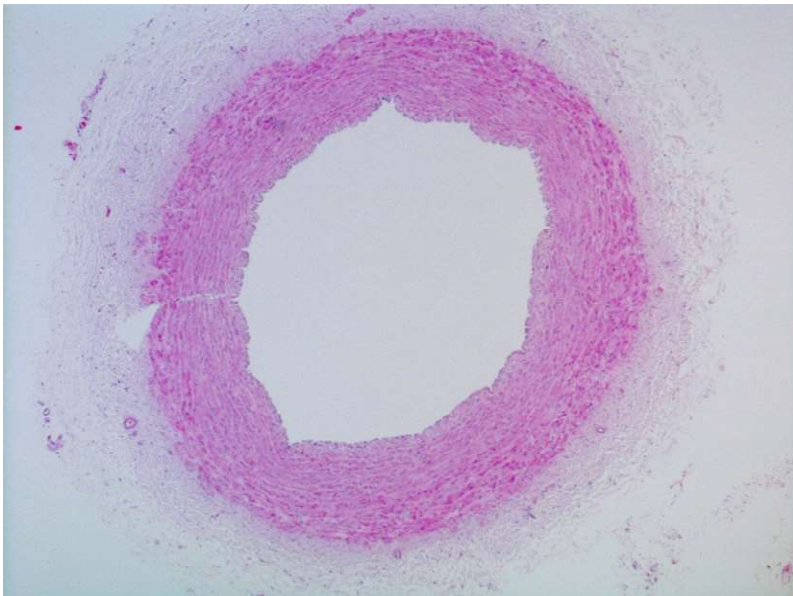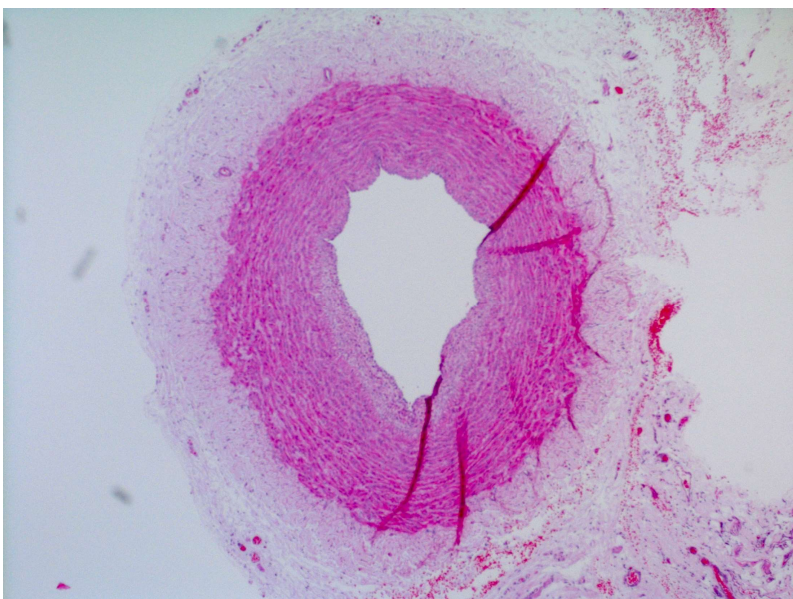

No.1 Masson's Trichrome (50X)

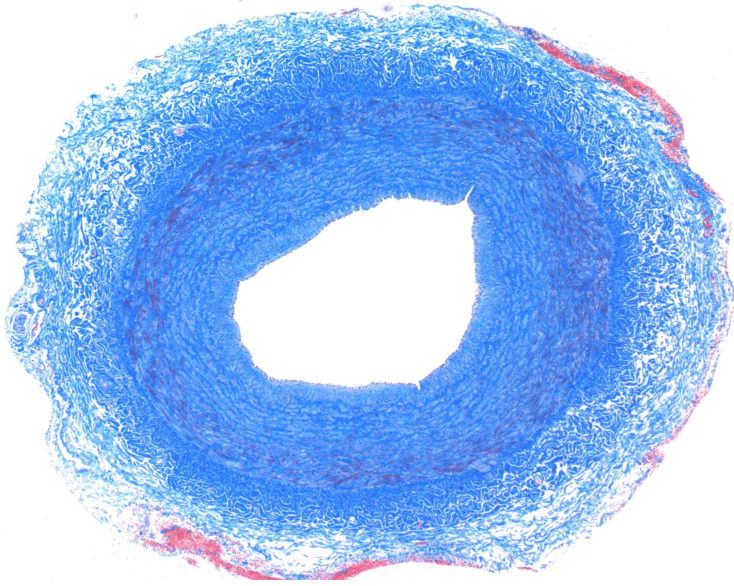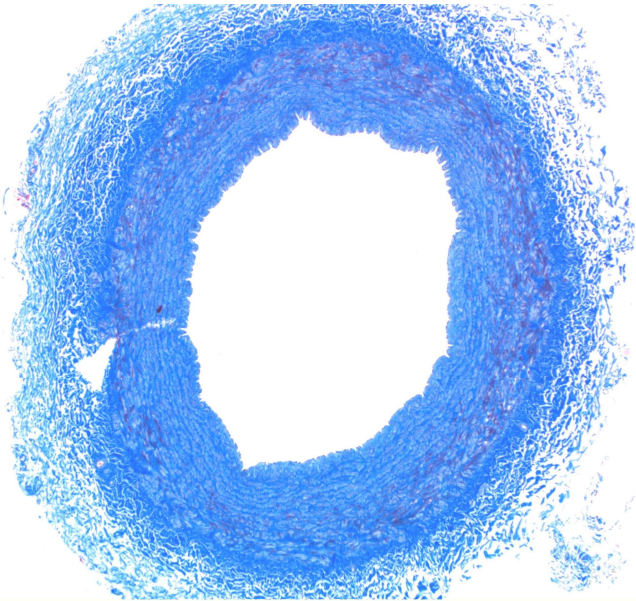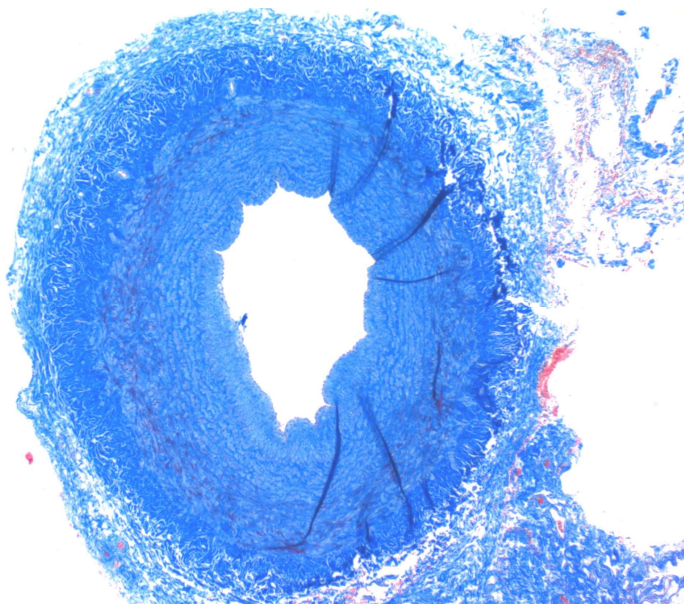



No.2 H&E (50X)

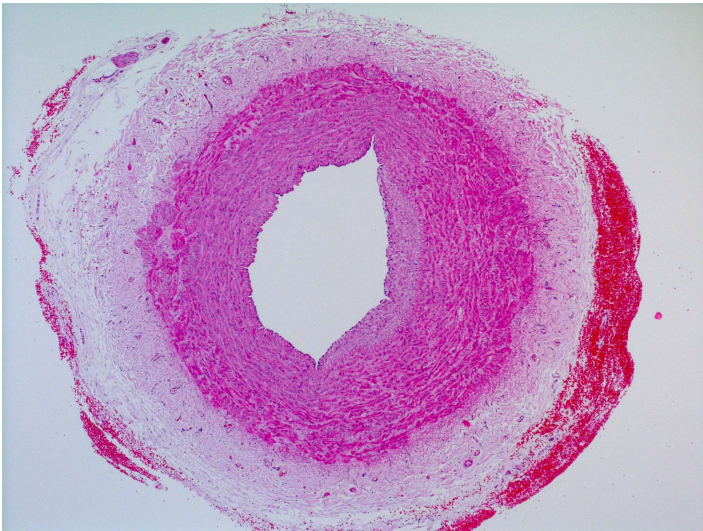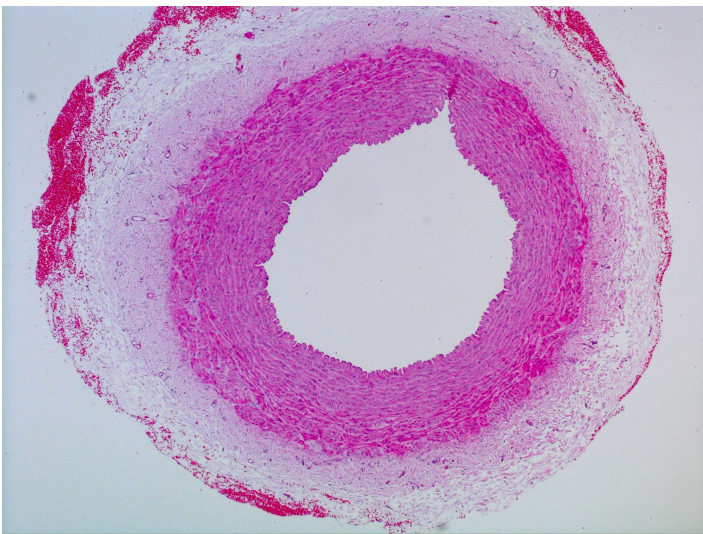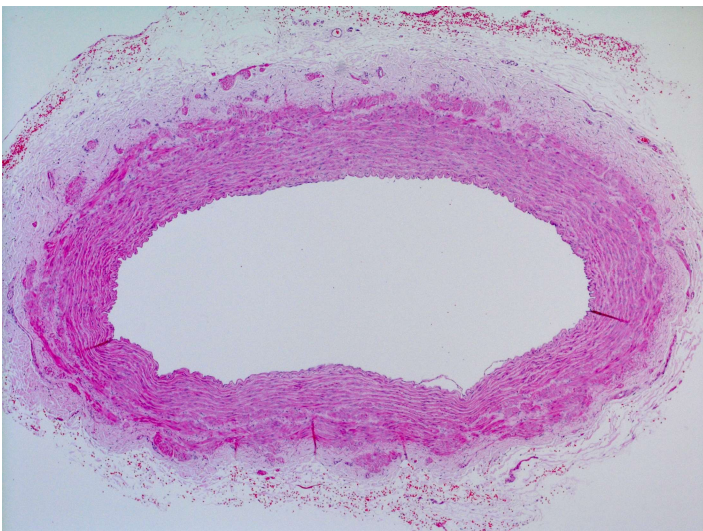

No.2 Masson's Trichrome (50X)

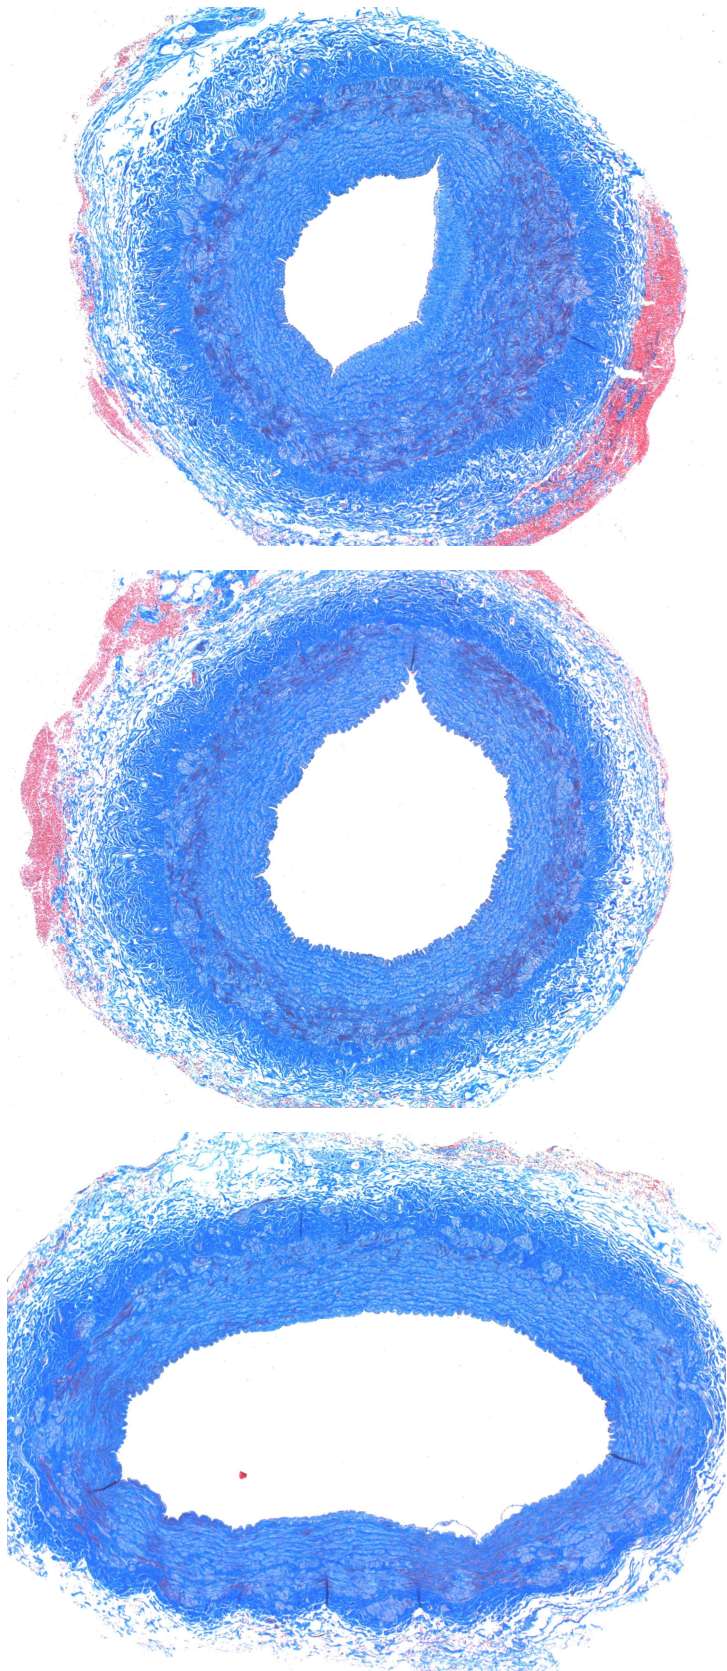



No.3 H&E (50X)

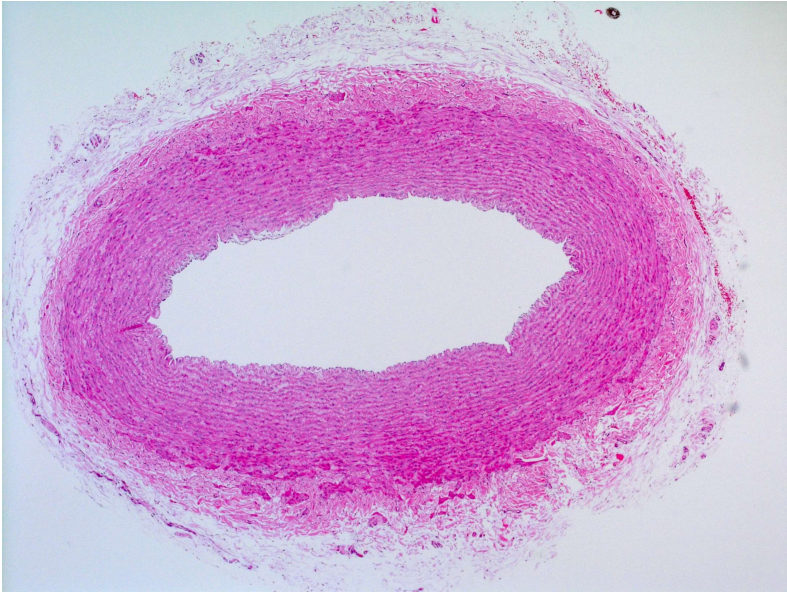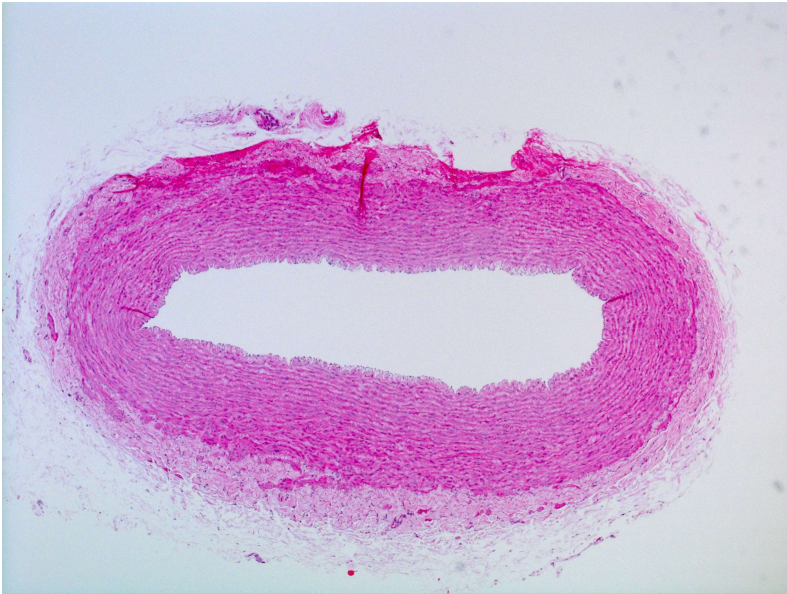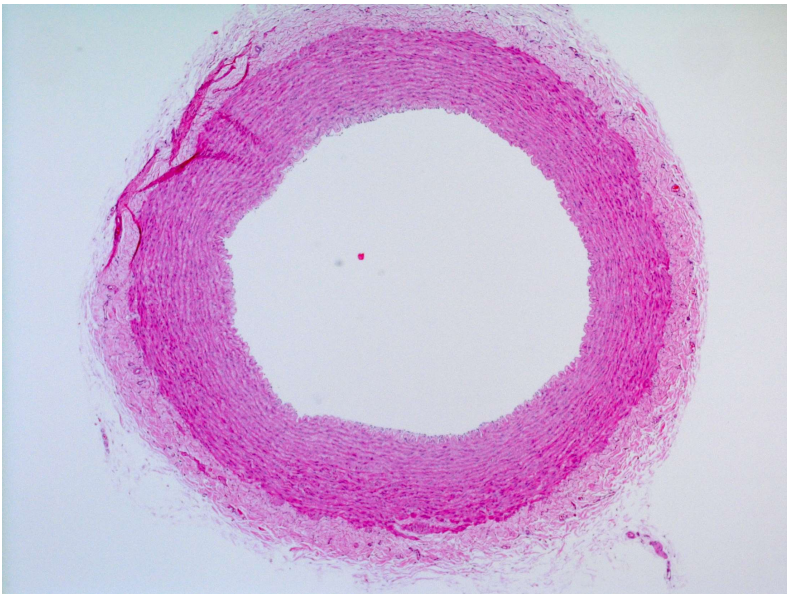

No.3 Masson's Trichrome (50X)

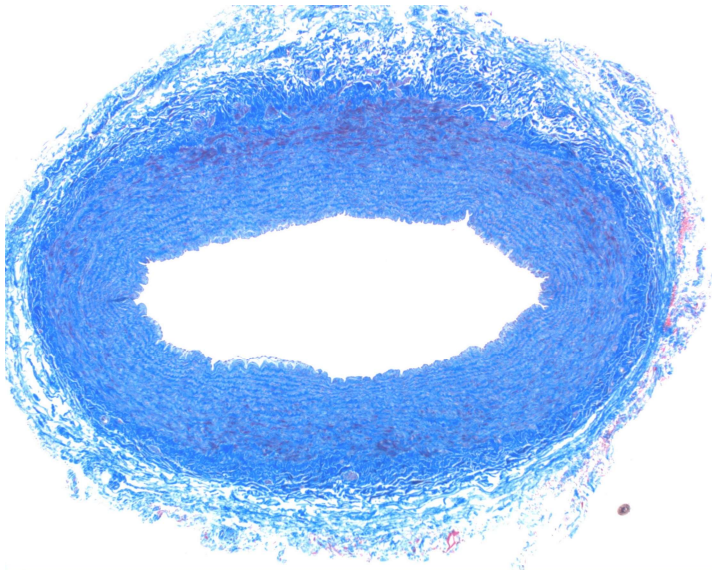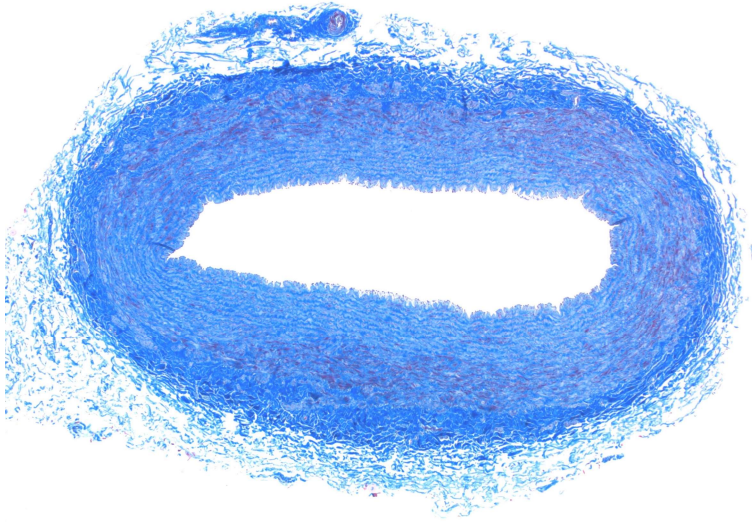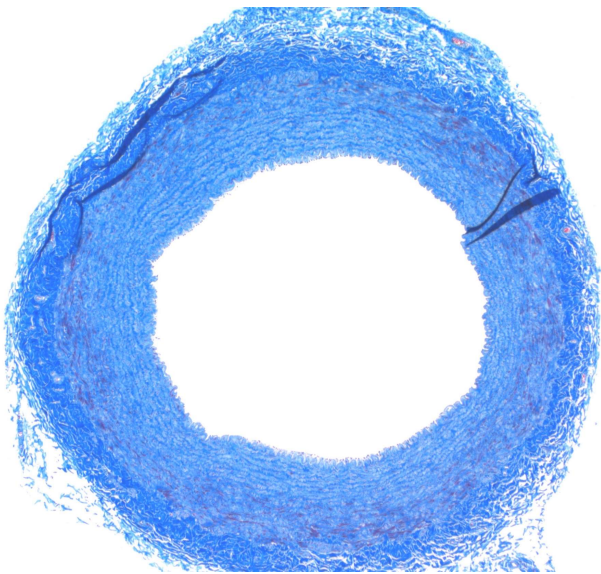



No.4 H&E (50X)

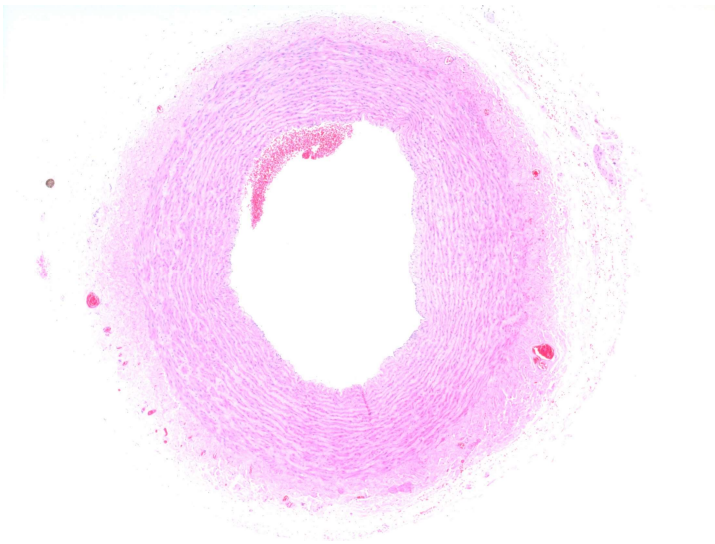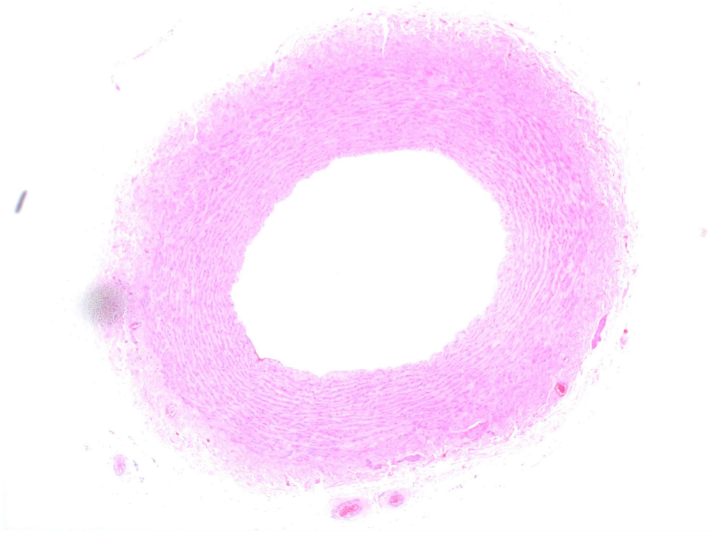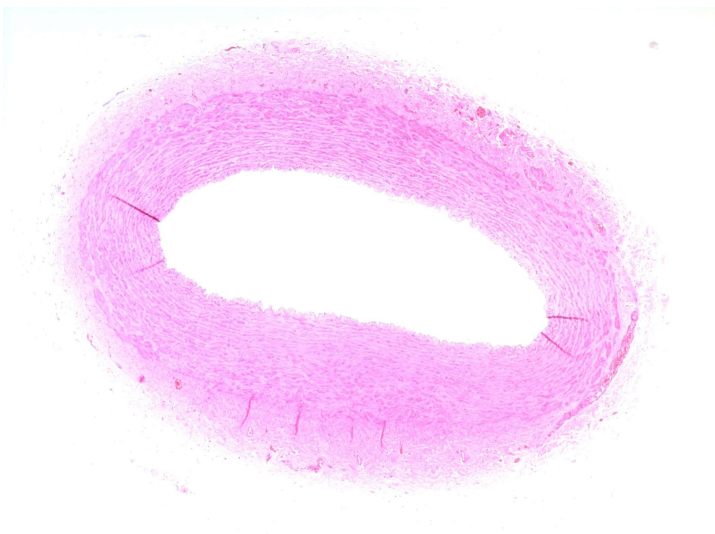

No.4 Masson's Trichrome (50X)

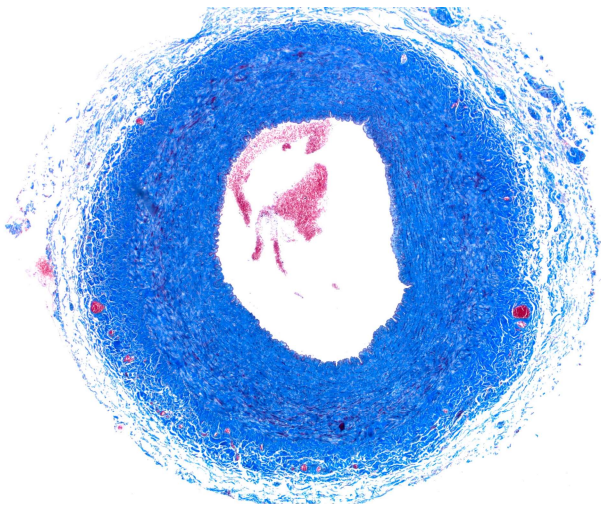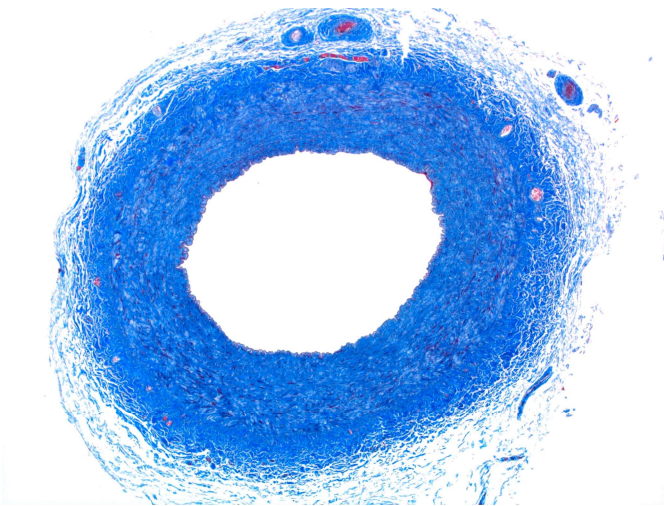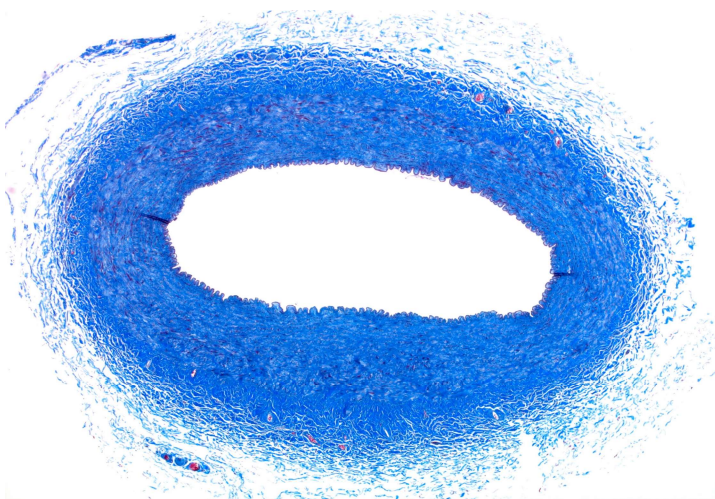



No.5 H&E (50X)

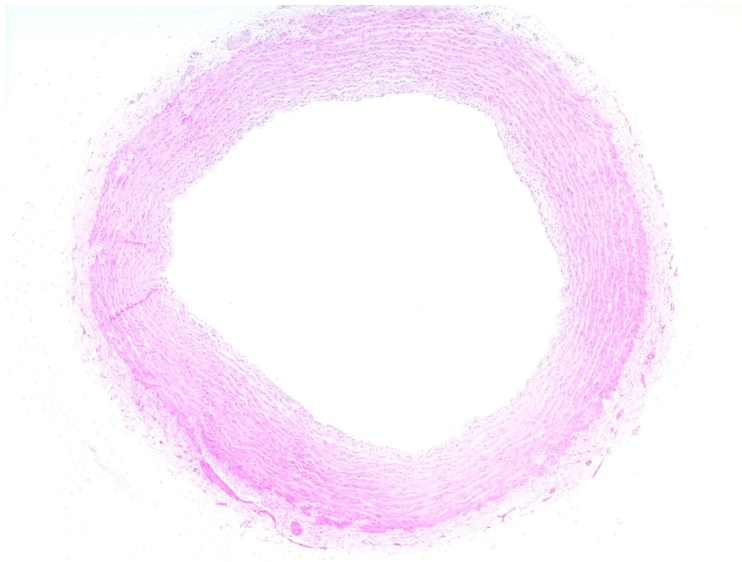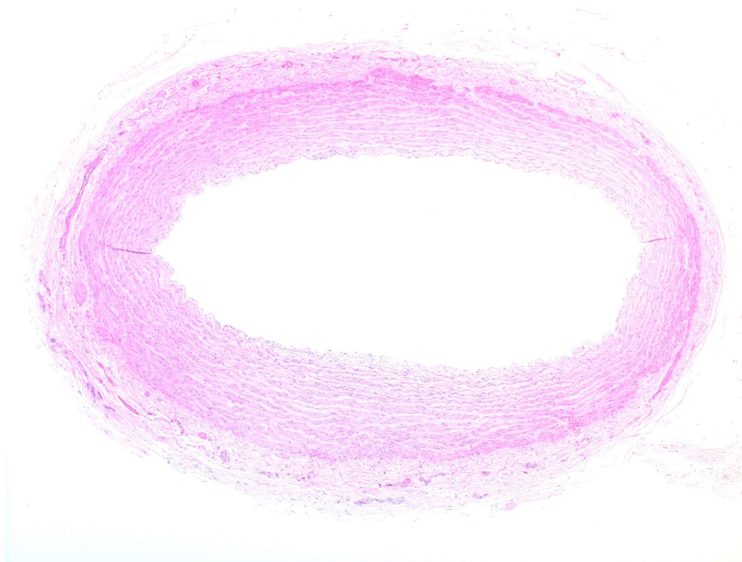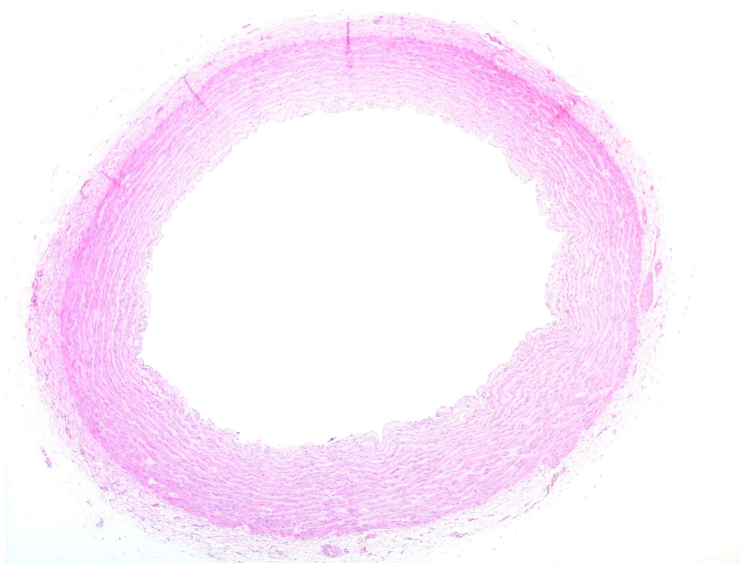

No.5 Masson's Trichrome (50X)

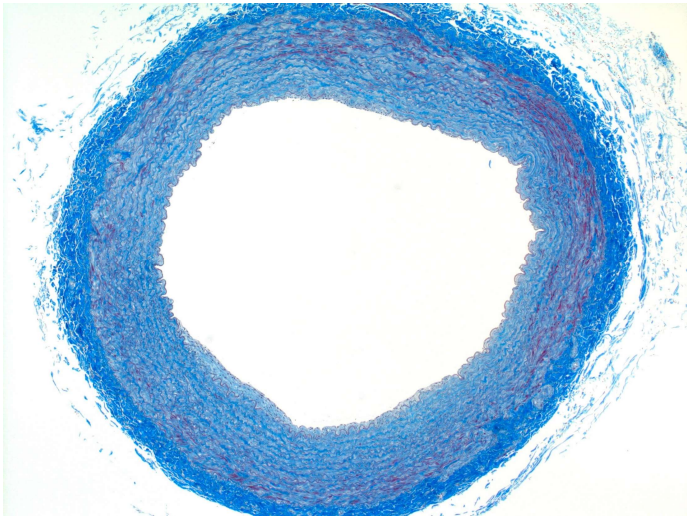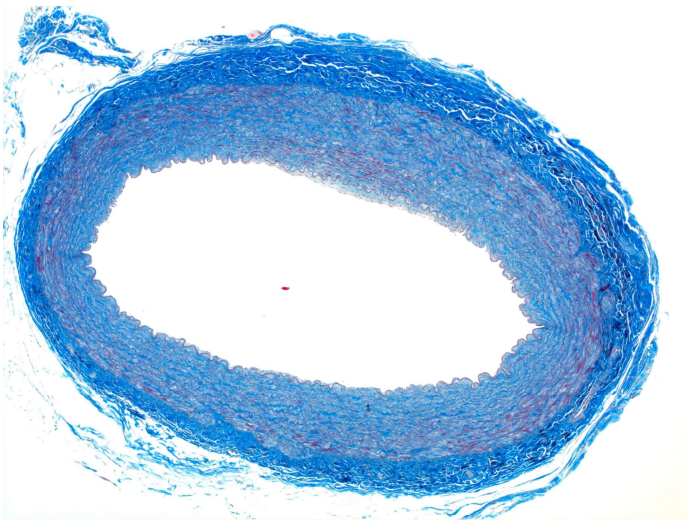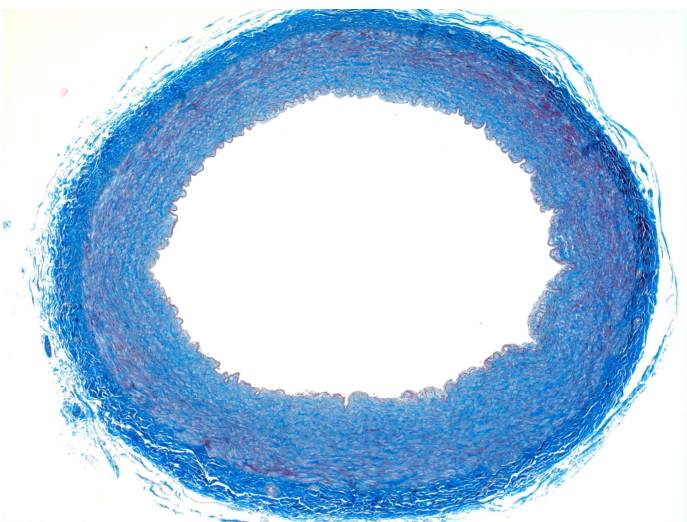



No.6 H&E (50X)

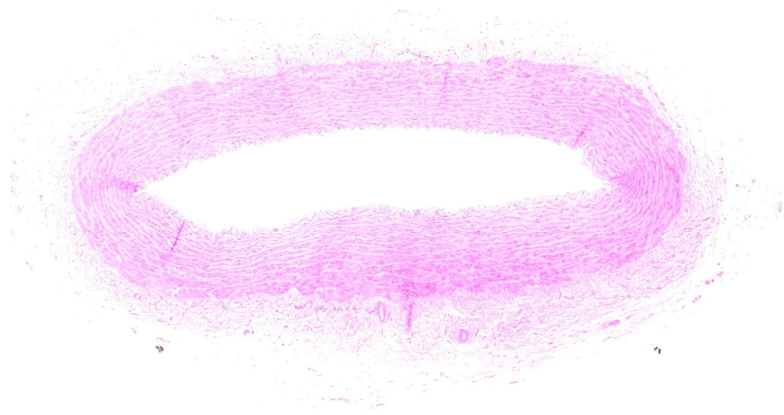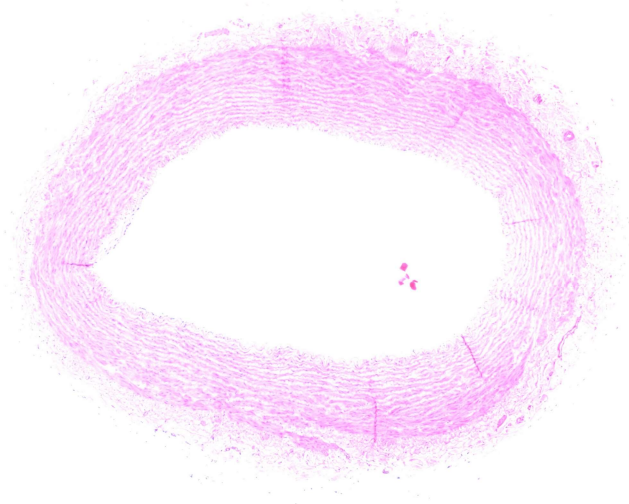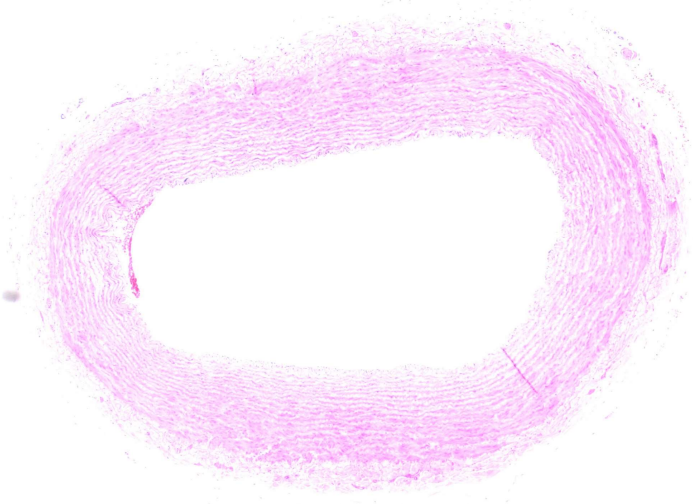

No.6 Masson's Trichrome (50X)

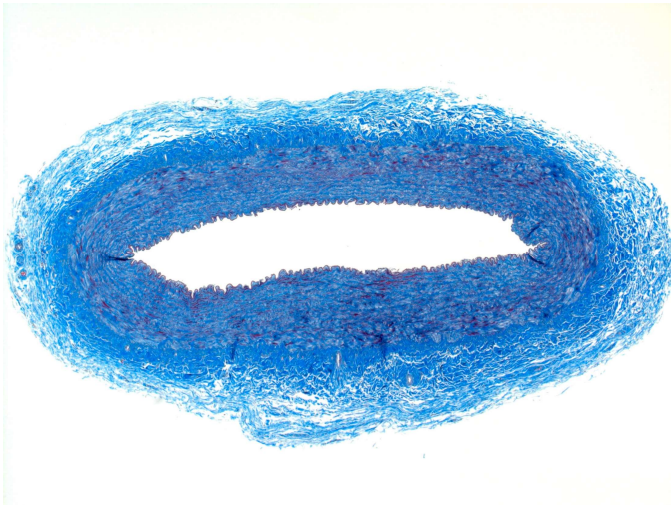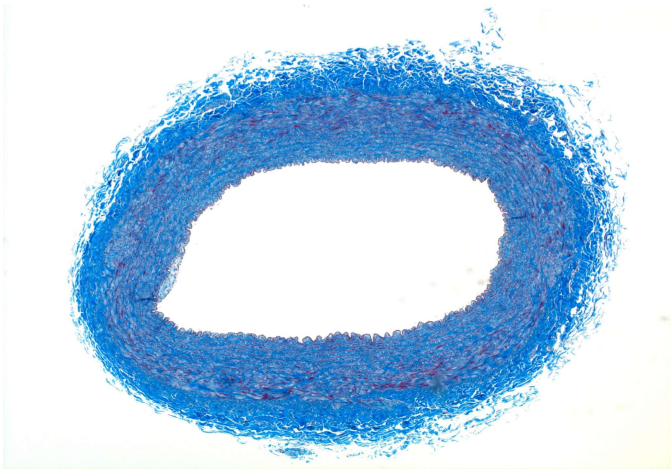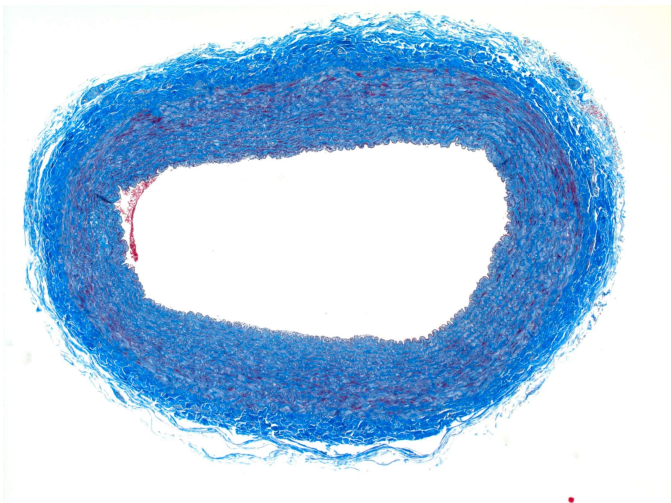



No.7 H&E (50X)

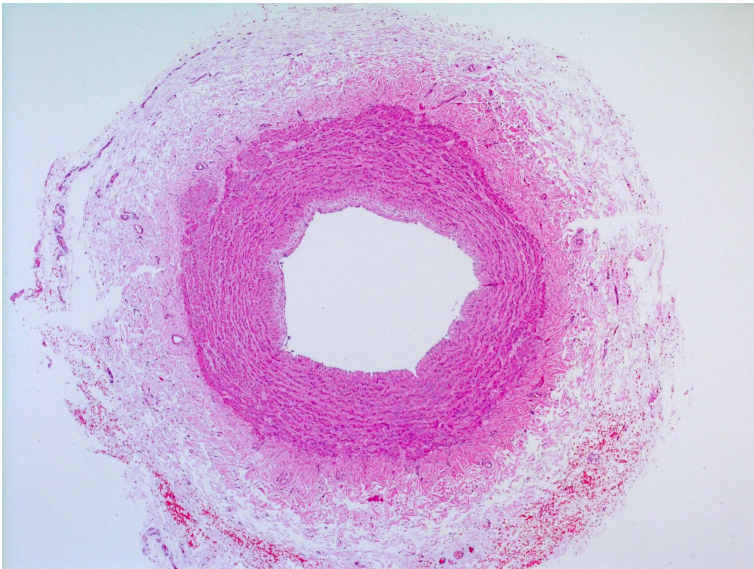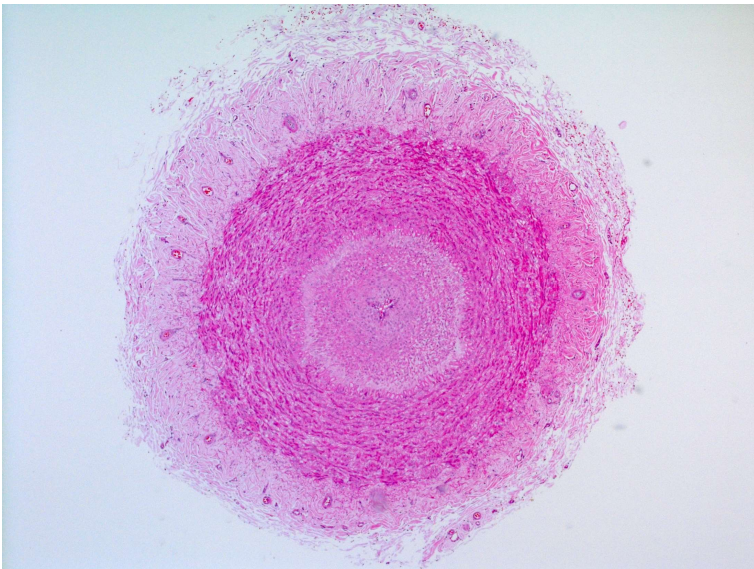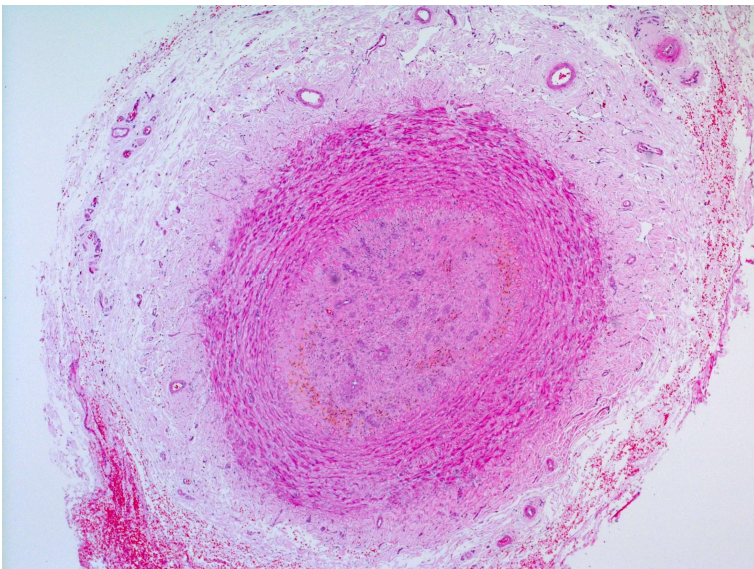



No.7 Masson's Trichrome (50X)

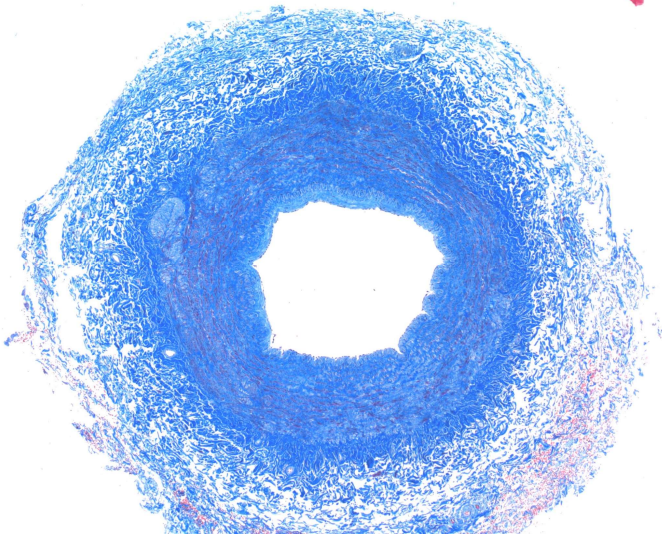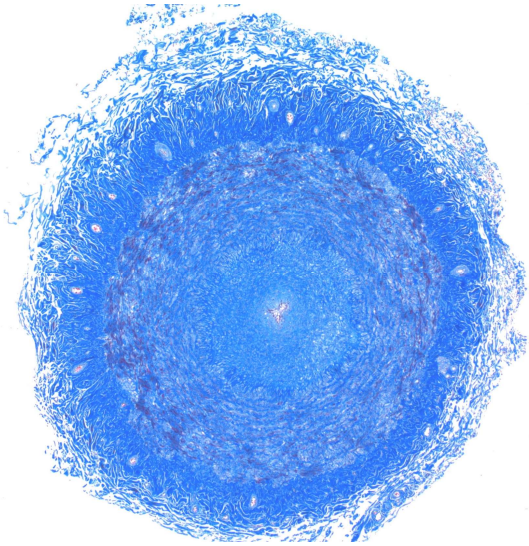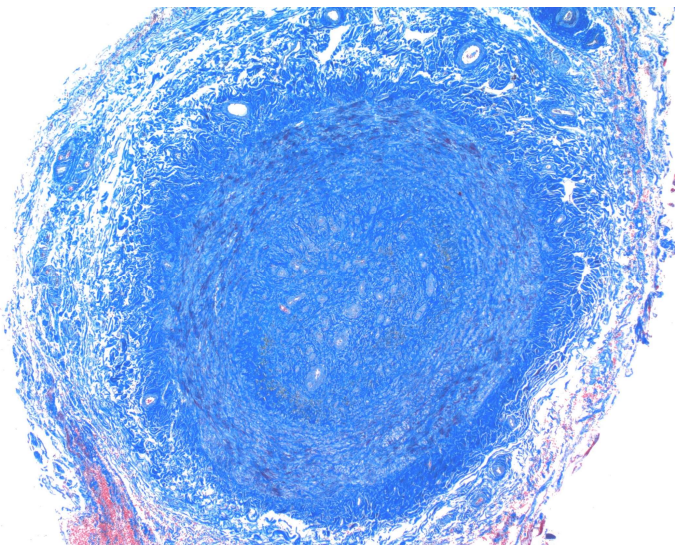



No.8 H&E (50X)

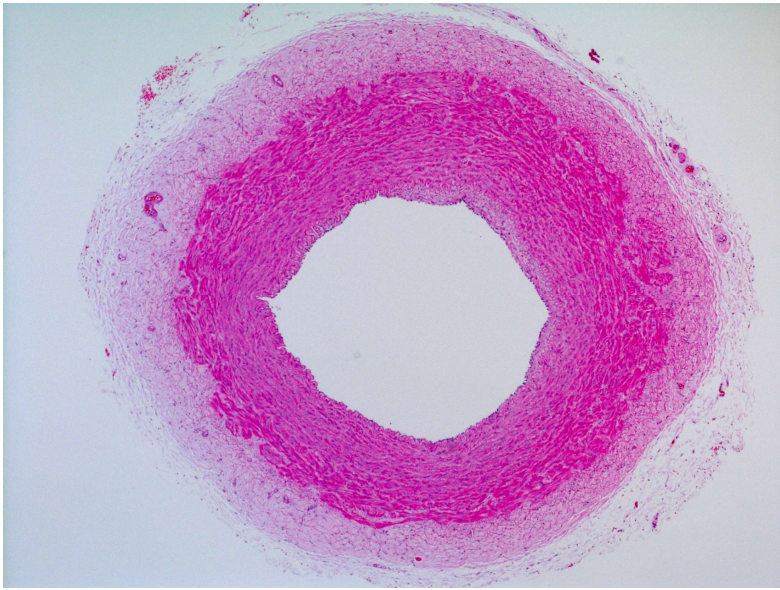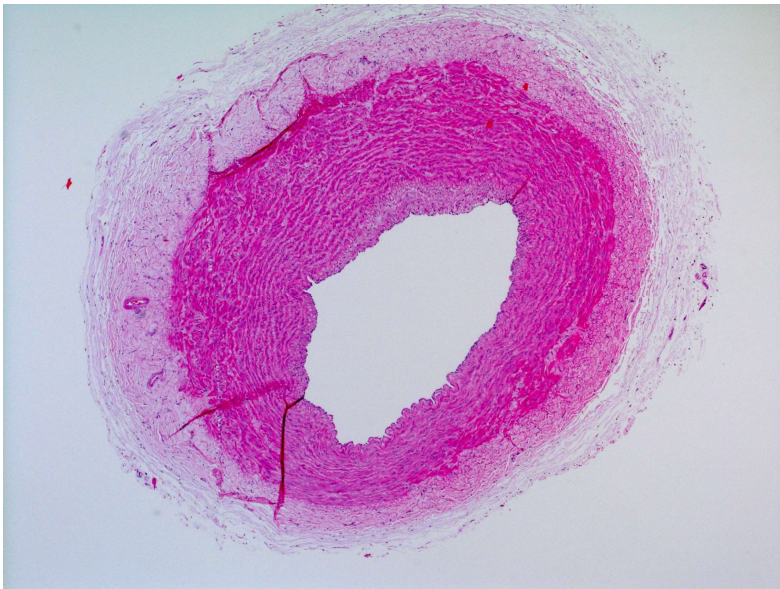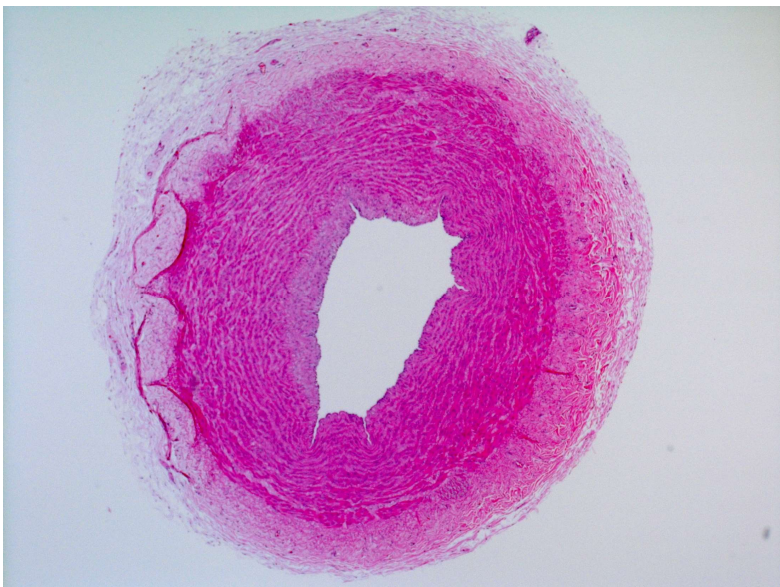

No.8 Masson's Trichrome (50X)

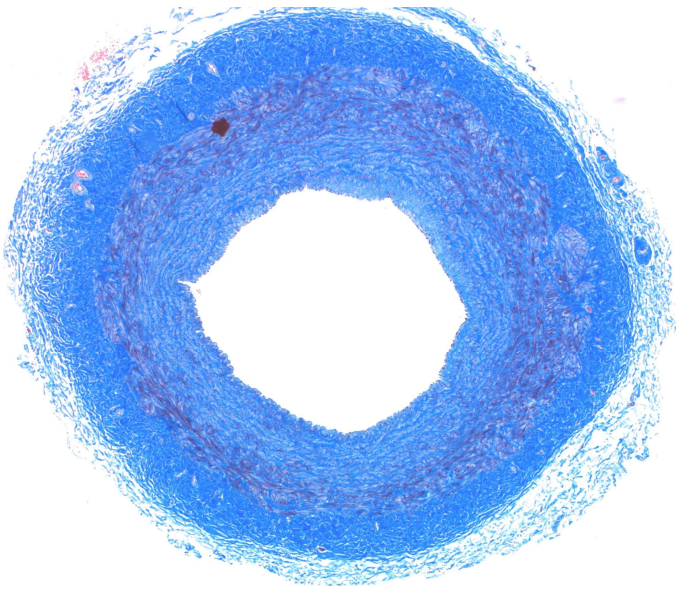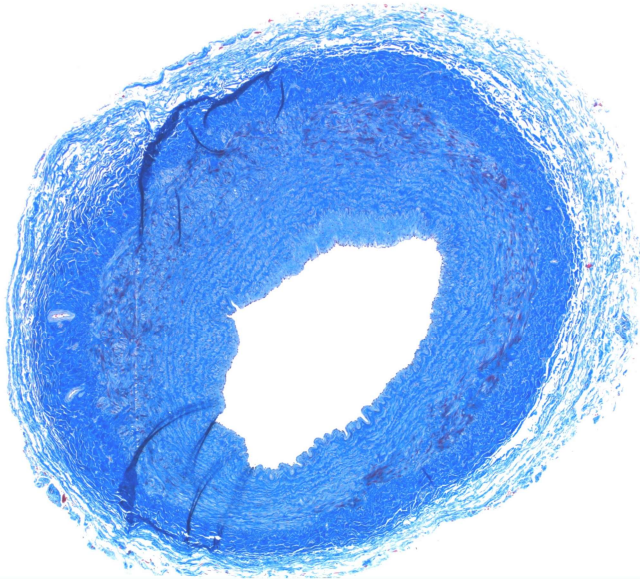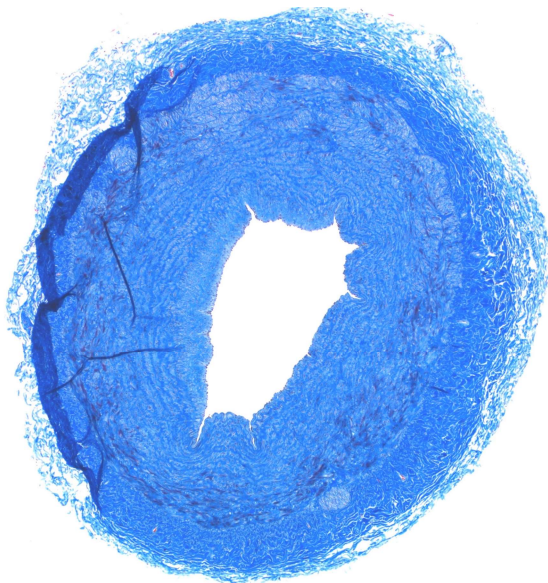



No.9 H&E (50X)

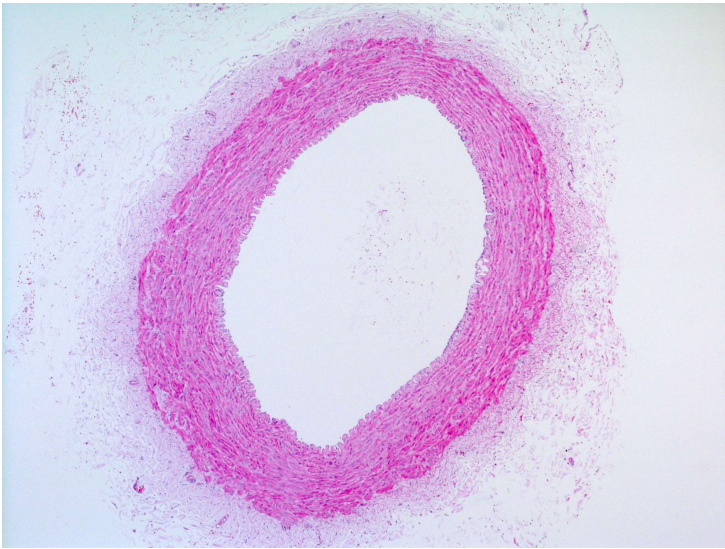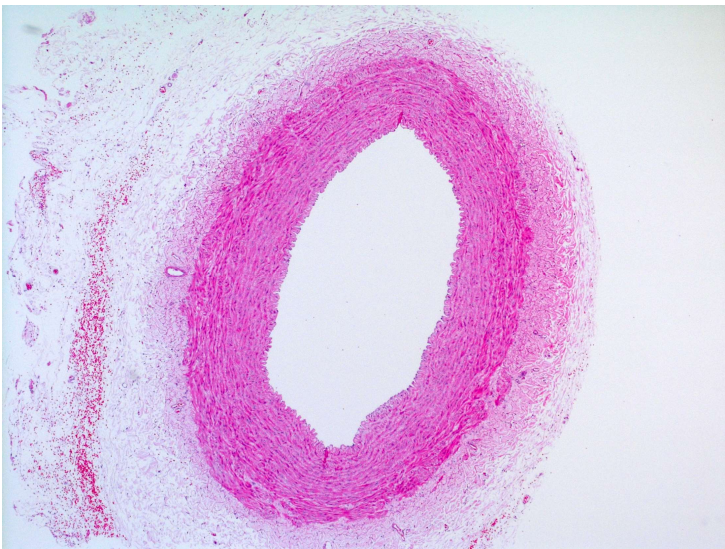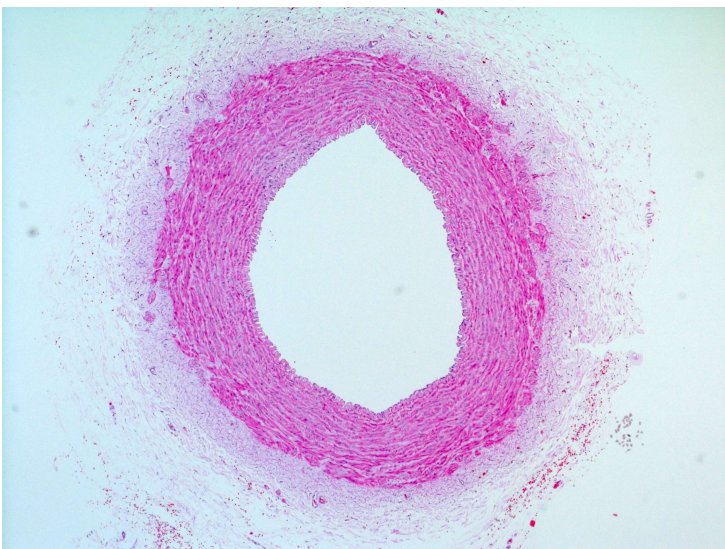

No.9 Masson's Trichrome (50X)

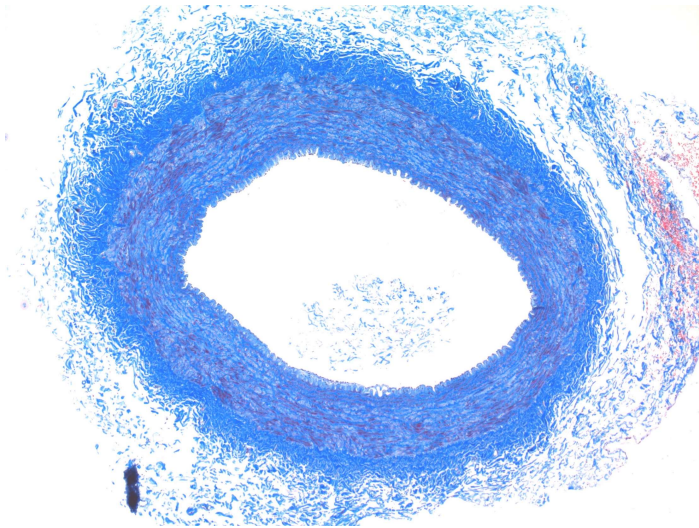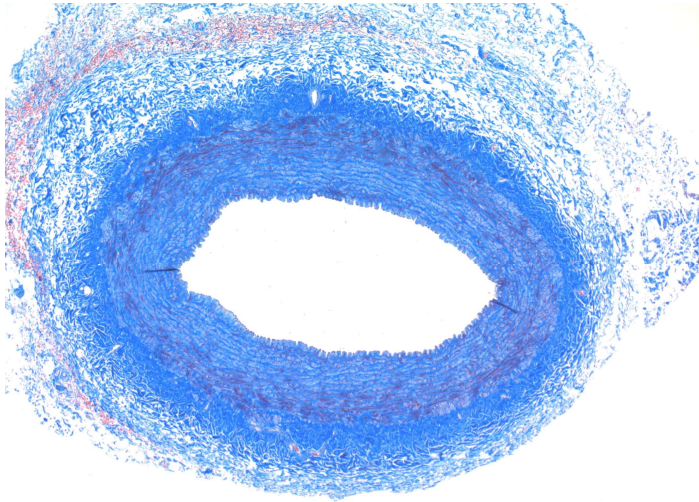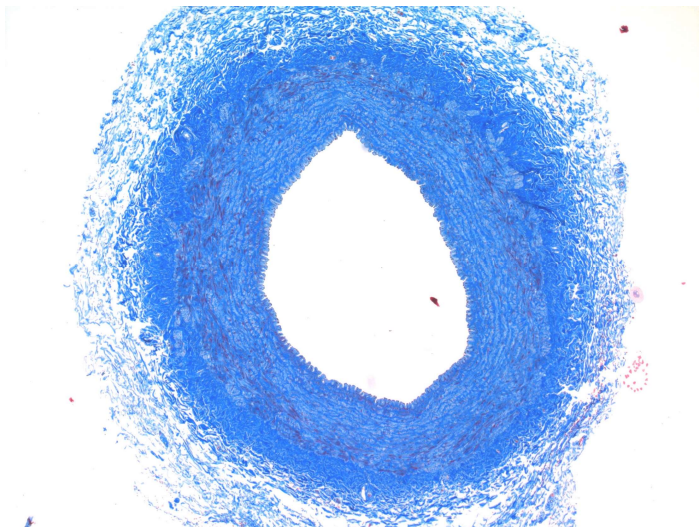



No.10 H&E (50X)

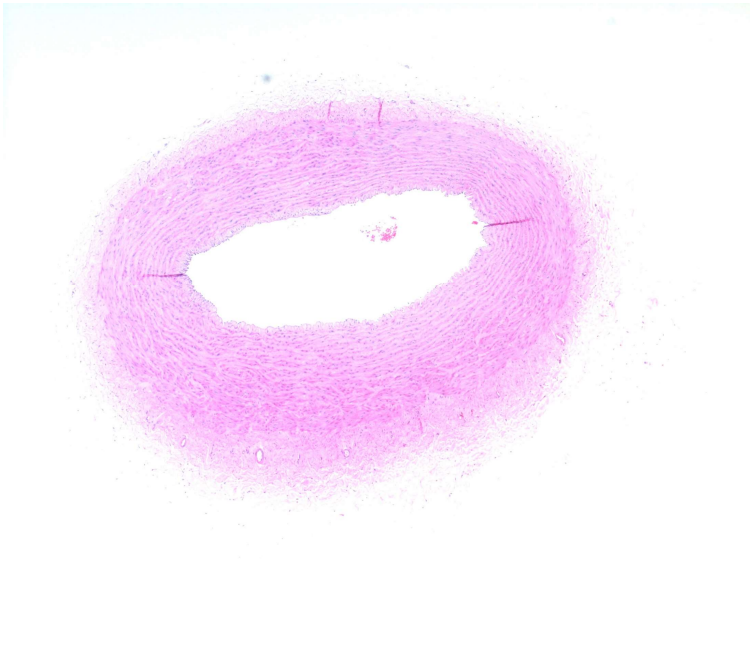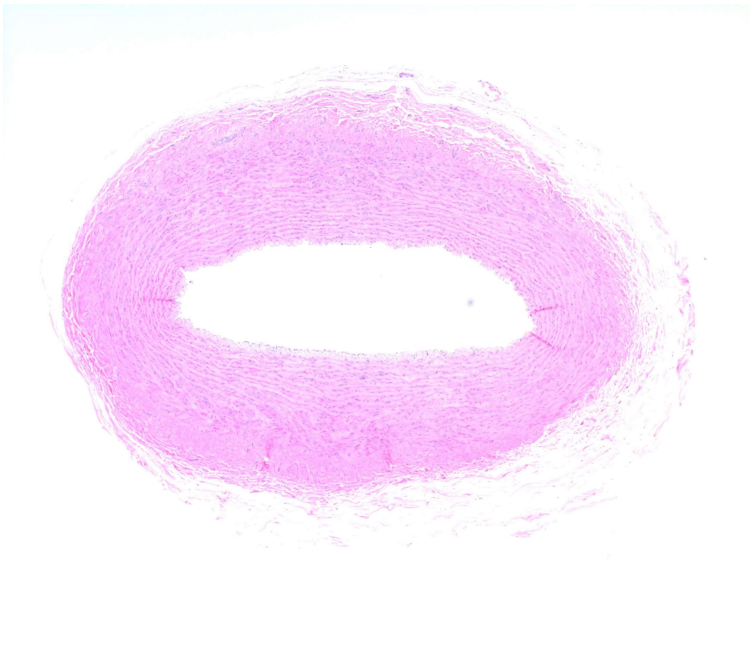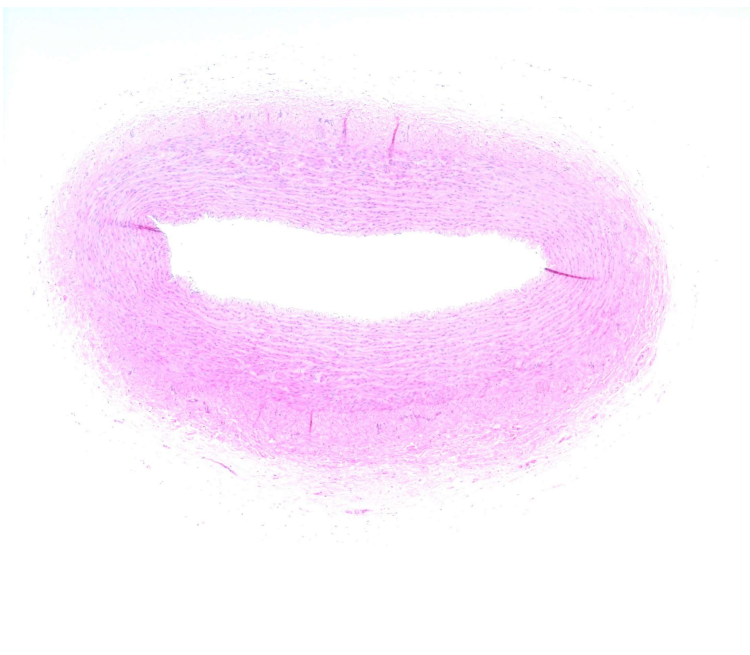

No.10 Masson's Trichrome (50X)

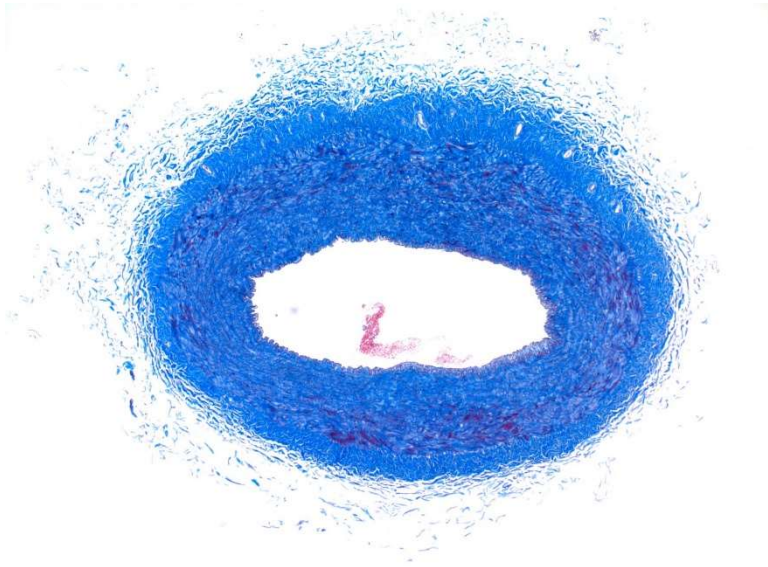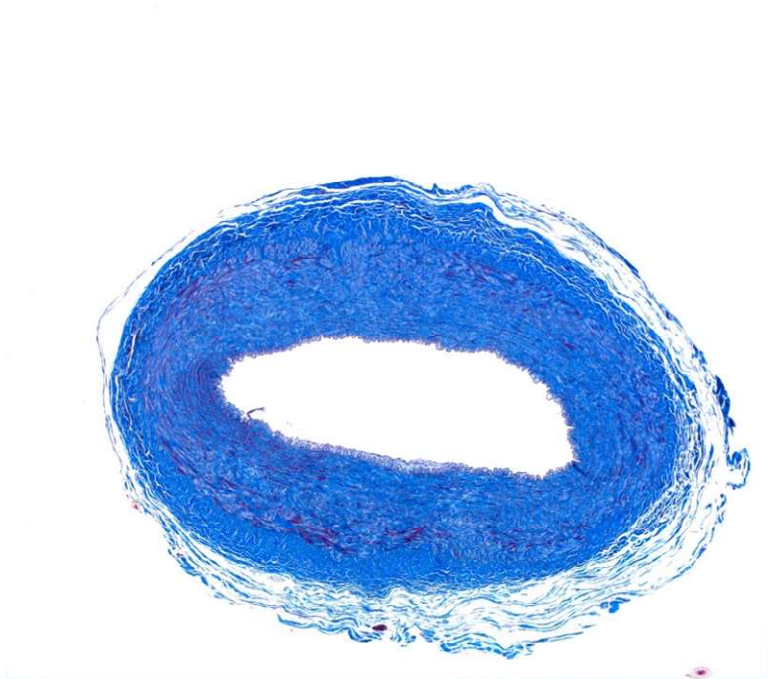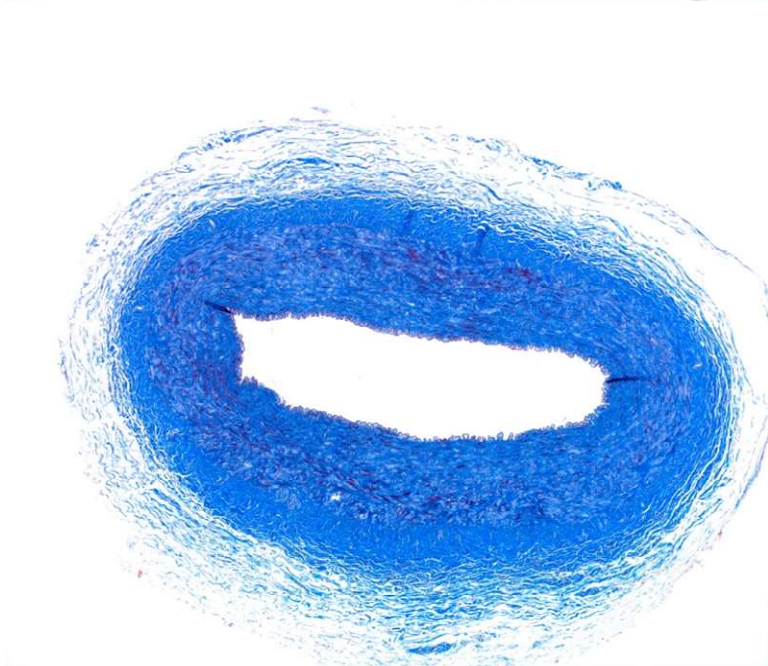



No.11 H&E (50X)

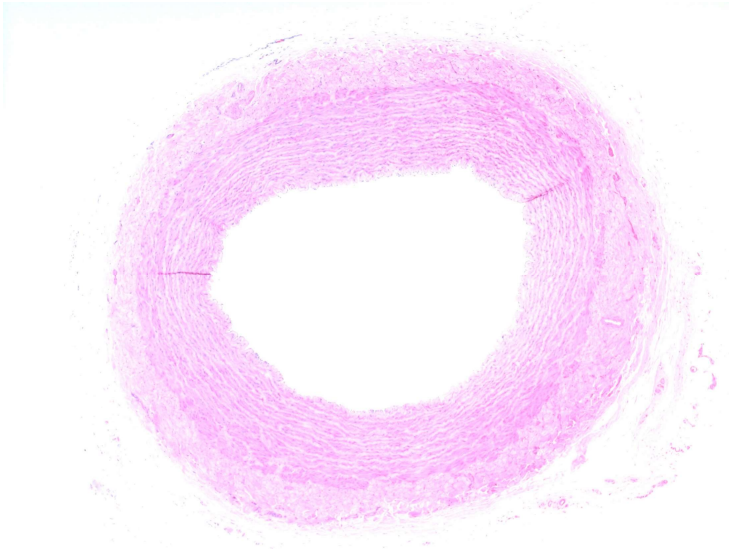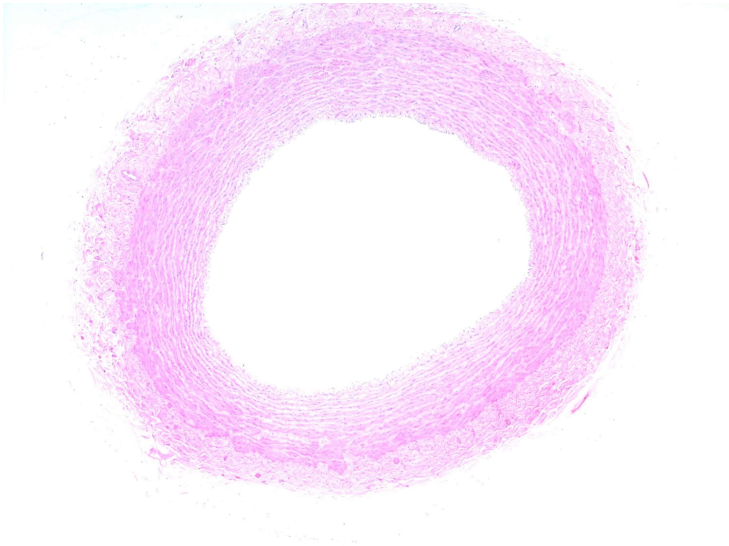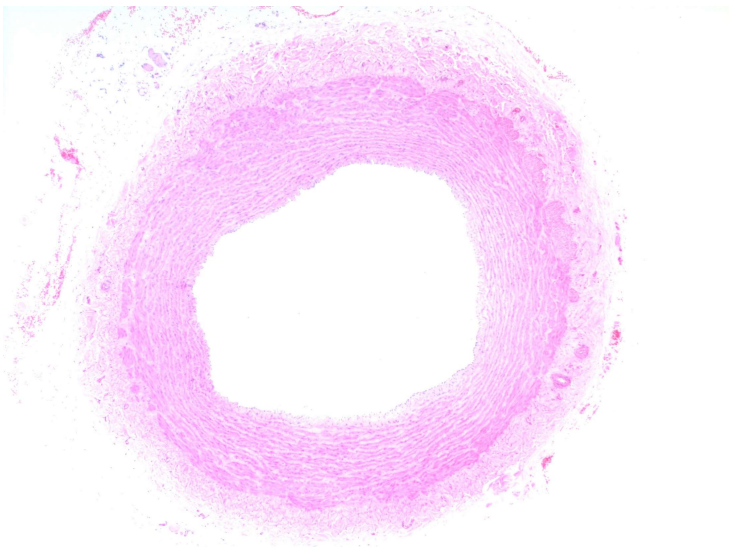

No.11 Masson's Trichrome (50X)

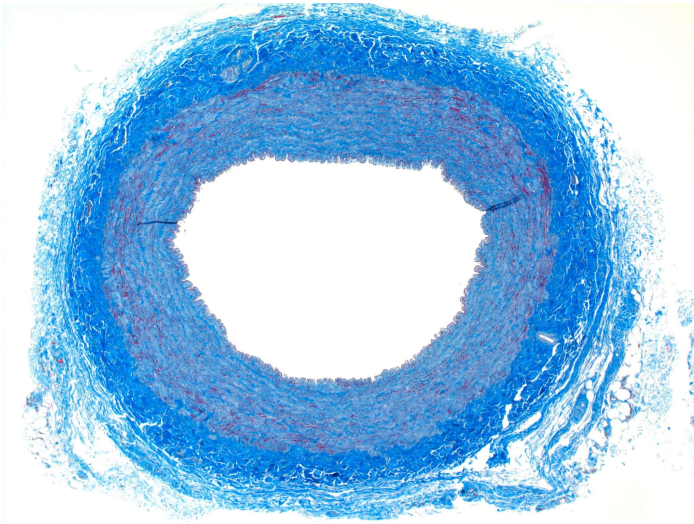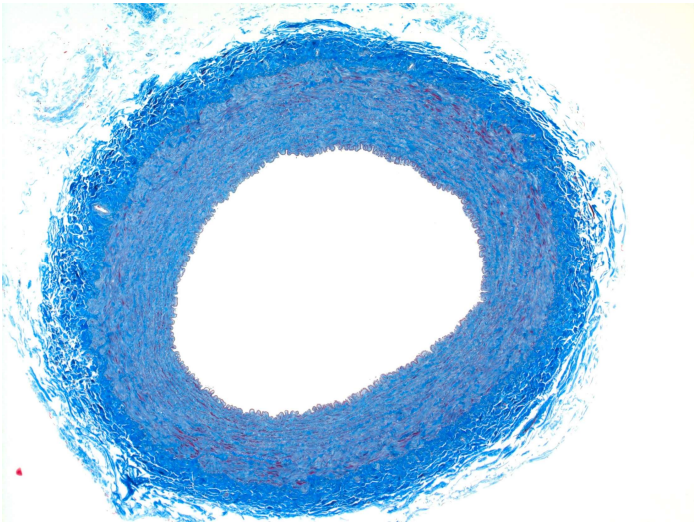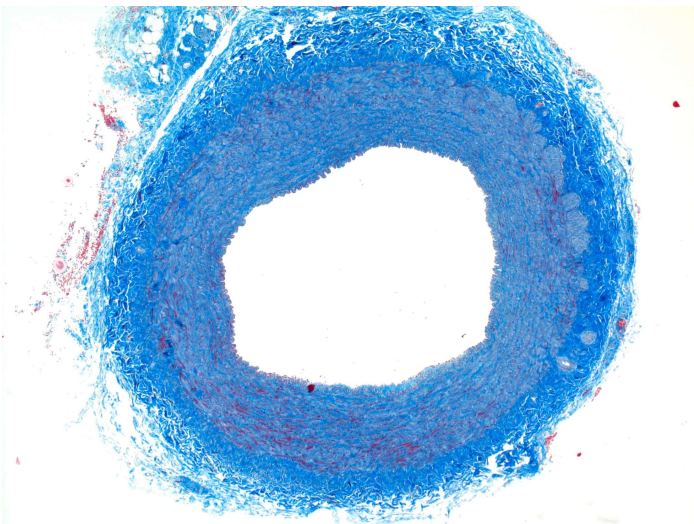



No.12 H&E (50X)

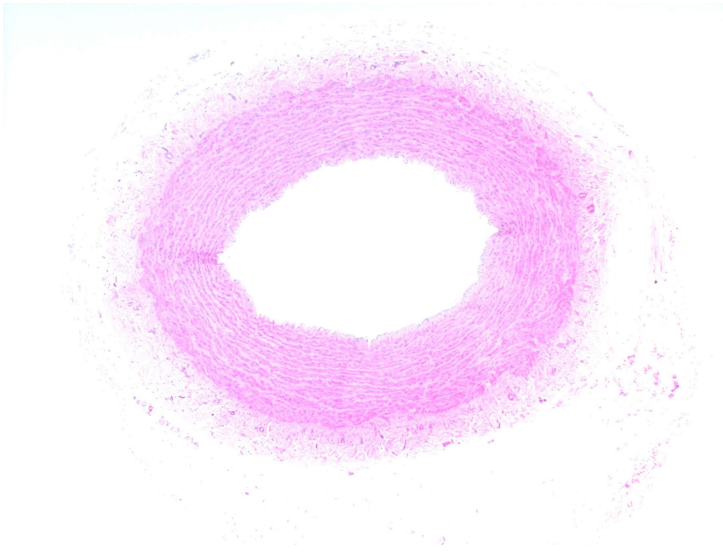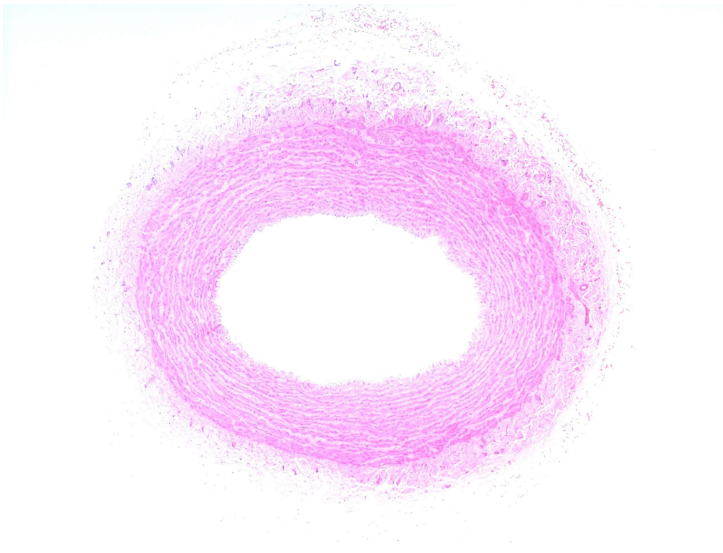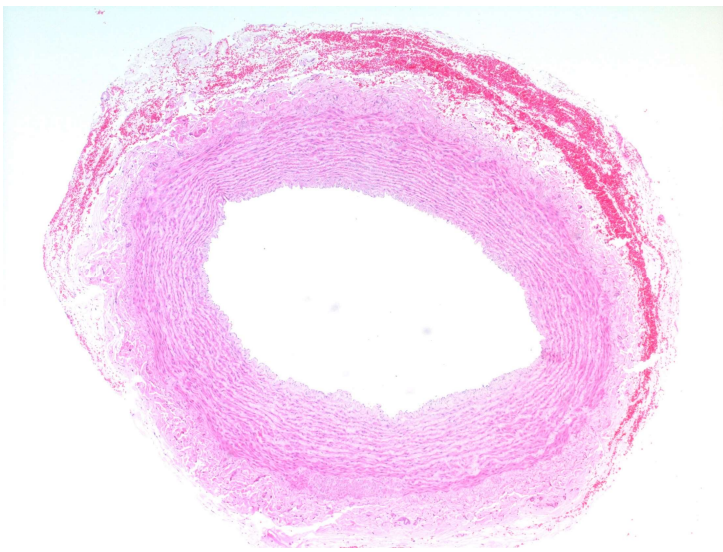

No.12 Masson's Trichrome (50X)

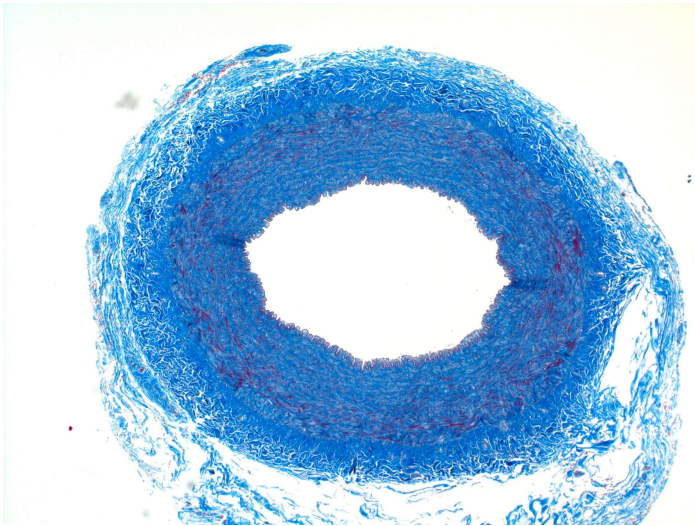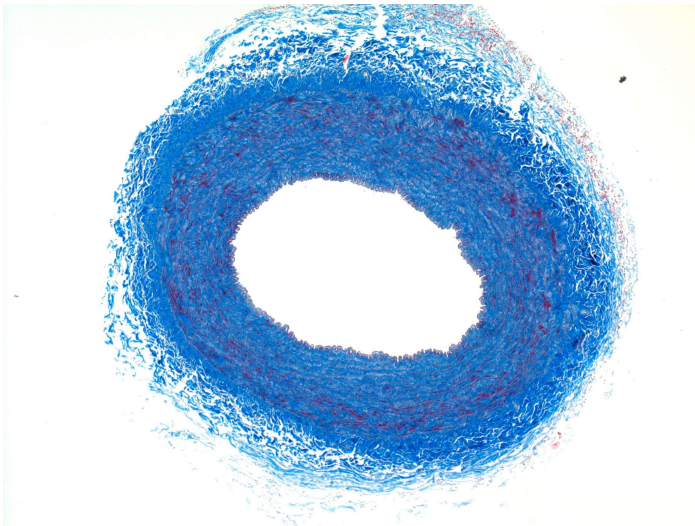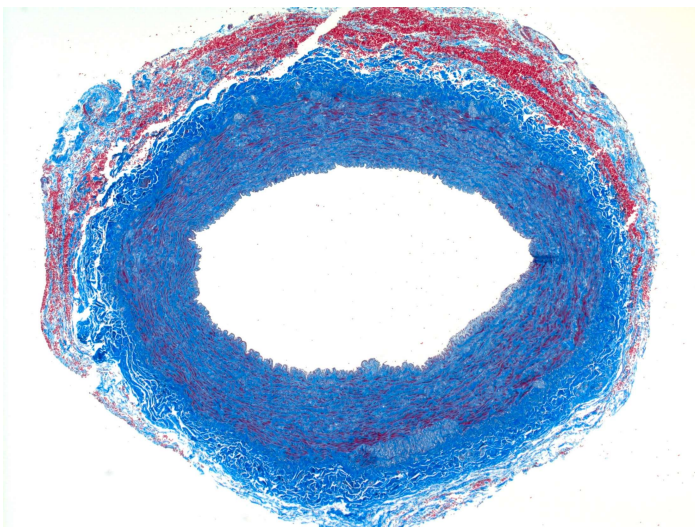

Supplement: pone.0276108.s001.pdf [file pone.0276108.s001.pdf]
